1 **ATPase and protease domain movements in the bacterial AAA+ protease**  
2 **FtsH are driven by thermal fluctuations**

3

4 **Running title: Inter-domain dynamics of FtsH**

5

6 Martine Ruer<sup>1,2,†</sup>, Georg Krainer<sup>1,3,†</sup>, Philip Gröger<sup>1</sup>, Michael Schlierf<sup>1,\*</sup>

7

8 <sup>1</sup> B CUBE – Center for Molecular Bioengineering, Technische Universität Dresden,  
9 Arnoldstr. 18, 01307 Dresden, Germany

10 <sup>2</sup> Current address: Max Planck Institute of Molecular Cell Biology and Genetics (MPI-CBG),  
11 Pfotenhauer Str. 108, 01307 Dresden, Germany

12 <sup>3</sup> Molecular Biophysics, Technische Universität Kaiserslautern (TUK), Erwin-Schrödinger-  
13 Str. 13, 67663 Kaiserslautern, Germany

14

15 <sup>†</sup> These authors contributed equally to this work.

16 <sup>\*</sup> Corresponding author. Tel: +49 351 463 43050; E-mail: michael.schlierf@tu-dresden.de

17 **Abstract**

18 AAA+ proteases are essential players in cellular pathways of protein degradation. Elucidating  
19 their conformational behavior is key for understanding their reaction mechanism and,  
20 importantly, for elaborating our understanding of mutation-induced protease deficiencies. Here,  
21 we study the structural dynamics of the *Thermotoga maritima* metalloprotease FtsH (*TmFtsH*).  
22 Using a single-molecule FRET approach to monitor the real-time ATPase and protease inter-  
23 domain conformational changes, we show that *TmFtsH*—even in the absence of nucleotide—is  
24 a highly dynamic protease undergoing conformational transitions between five states on the  
25 second timescale. Addition of ATP does not influence the number of states nor change the  
26 timescale of domain motions, but affects the state occupancy distribution leading to an inter-  
27 domain compaction. These findings suggest that thermal energy, but not chemical energy,  
28 provides the major driving force for conformational switching, while ATP, through a state  
29 reequilibration, introduces directionality into this process. The *TmFtsH* A359V mutation, a  
30 homolog of the human pathogenic A510V mutation of paraplegin causing hereditary spastic  
31 paraplegia (HSP), impairs the ATP-coupled domain compaction and, thus, may account for  
32 protease malfunctioning and pathogenesis in HSP.

33

34 **Keywords:** ATP-dependent proteases / conformational dynamics / SPG7 / protein degradation  
35 / single-molecule Förster Resonance Energy Transfer

## 36 **Introduction**

37 Cellular organisms maintain a stable and functional proteome by fine-tuned homeostasis  
38 mechanisms that regulate the expression, folding, and degradation of proteins [1]. Key players  
39 in the cellular pathways of protein degradation are AAA+ (ATPases associated with diverse  
40 cellular activities) proteases [2,3]. These energy-dependent molecular machines remove  
41 dysfunctional, misfolded, aggregated as well as no longer needed proteins from the proteome  
42 by their specific unfoldase and peptidase activities [4–9]. The importance of this cellular  
43 clearance system is eminently reflected in its impairments, as alterations in AAA+-based  
44 proteolysis are associated with various dysfunctions in bacteria [10,11] as well as a broad range  
45 of neurodegenerative, metabolic, and cancerous diseases in humans [12–16], most frequently  
46 caused only by single point mutations in the protease sequence.

47 One of the prototypic and highly conserved AAA+ proteases in eubacteria, mitochondria, and  
48 chloroplasts is the membrane-embedded metalloprotease FtsH [10,11,17]. FtsH forms ring-like  
49 hexameric assemblies of monomer subunits exposing a central pore, through which the  
50 unfolded protein substrate is translocated. Each monomeric subunit consists of a protease and  
51 ATPase domain, which are connected via a hinge region [10]. Recent crystallographic  
52 structures of *Thermotoga maritima* FtsH (*TmFtsH*) without nucleotide and in the presence of  
53 ADP revealed a large conformational change between the ATPase and the protease domain  
54 upon ADP binding, thus suggesting an ATP-coupled chemo-mechanical cycle that involves a  
55 coordinated opening and closing of the two domains between two states [18,19] (Fig. 1a). Even  
56 though these structures showcase the large conformational transitions *TmFtsH* domains can  
57 undergo, mechanistic models inferred from the crystal structures often report only on a limited  
58 number of conformational states and do not provide dynamic information. Elucidating the  
59 underlying reaction mechanism of *TmFtsH* and other proteases, however, requires kinetic  
60 insights for understanding the interplay of ATP binding to conformational changes and,  
61 importantly, for elaborating our understanding in protease deficiency-related diseases. For  
62 example, the pathogenic mutation A510V of the human *TmFtsH*-structural homolog paraplegin  
63 (SPG7) can cause hereditary spastic paraplegia (HSP) [13,20–22] and is located right at the  
64 hinge between the ATPase and protease domain [23], indicating that a relative movement might  
65 be impaired. However, our understanding of the dynamic influence of potentially disruptive  
66 mutations on conformational changes and ATP coupling remains elusive.

67 Intramolecular dynamics of multi-component enzymes like AAA+ proteases are challenging to  
68 resolve because of the experimental difficulties encountered in probing the unsynchronized

69 motions of their constituent subunits or domains [24]. Recent advances in single-molecule  
70 experiments have enabled the direct observation of individual molecular machines at work,  
71 providing real-time kinetic information on unsynchronized nanoscale motions of enzymes and  
72 their subunit structures, which have previously eluded a quantitative description by classical  
73 biochemical and structural biology methods [25–29].

74 Here, we exploited a single-molecule Förster resonance energy transfer (smFRET) approach to  
75 study the real-time ATPase and protease inter-domain conformational changes of *TmFtsH*. We  
76 found that inter-domain movements of monomer subunits within assembled *TmFtsH* hexamers  
77 occur on the second timescale, are thermally driven, and weakly coupled to ATP binding or  
78 hydrolysis. By performing kinetic analysis based on Hidden Markov modelling, we uncovered  
79 five conformational states of *TmFtsH*, thereby expanding the previous knowledge of the two  
80 crystallographic structures. Using this approach, we further studied the effects of the A359V  
81 mutation, which is homologous to the human A510V paraplegin mutation, and found that this  
82 mutation perturbs the conformational behavior of *TmFtsH* upon ATP binding, thereby  
83 providing a potential mechanism for protease malfunctioning and disease pathogenesis in HSP.

## 84 **Results**

### 85 **Probing the real-time conformational changes in *TmFtsH* with smFRET**

86 To monitor ATPase and protease inter-domain dynamics in *TmFtsH*, we established a smFRET  
87 assay that allows probing of structural changes in single *TmFtsH* monomers within self-  
88 hexamerized *TmFtsH* rings. To this end, we created a Cys-light variant (*TmFtsH*<sub>184,513</sub>) lacking  
89 the transmembrane domain of *TmFtsH* (as described in Bieniossek et al. [18,19]) but carrying  
90 two unique Cys residues, one at position 184 in the ATPase domain, and another wild-type  
91 cysteine at position 513 in the protease domain. One fraction of *TmFtsH*<sub>184,513</sub> was kept  
92 unlabeled while the other fraction was reacted with maleimide-functionalized FRET donor  
93 (Cy3) and an acceptor (Cy5) fluorophores to obtain double-labeled *TmFtsH*<sub>184,513</sub> monomer  
94 units (Fig. 1a). The dye labels were placed at positions close to the tip of each domain at a  
95 distance such that significant changes in the FRET efficiency are expected if these domains  
96 move relatively to each other. Functional assays testing the ATPase and protease activities  
97 confirmed that the *TmFtsH*<sub>184,513</sub> variant retained both activities (Figs. S1 and S2, respectively).  
98 To assemble *TmFtsH*<sub>184,513</sub> into their active homohexameric rings, a concentration exceeding  
99 the oligomer dissociation constant on the order of ~400 nM is required. However, working with  
100 such high concentrations of labeled protein in solution would result in a high background signal  
101 in smFRET experiments [26]. We therefore exploited a lipid vesicle-based nanocontainer

102 approach [30] to increase the effective concentrations of *TmFtsH* monomers through molecular  
103 confinement. We encapsulated a concentrated *TmFtsH* monomer solution in ~200-nm diameter  
104 phospholipid vesicles, yielding an apparent concentration of the protease monomers inside the  
105 vesicles of ~2.3 mM, thus ensuring self-hexamerization (Fig. 1b). Co-encapsulation of labeled  
106 and unlabeled *TmFtsH*<sub>184,513</sub> monomers in a 1:5 ratio yields one labeled *TmFtsH*<sub>184,513</sub> per  
107 assembled hexamer on average, thus allowing to probe conformational switching of one  
108 monomer within an active homohexameric ring. The lipid vesicles were composed of 1,2-  
109 dimyristoyl-*sn*-glycero-3-phosphocholine (DMPC), which selectively permeabilizes the  
110 membrane for ATP addition [30], and contained also a small fraction of 1,2-dipalmitoyl-*sn*-  
111 glycerol-3-phosphoethanolamine-N-(cap biotinyl) (biotin-DPPE) to tether the vesicles to a  
112 quartz slide via biotin–streptavidin interactions. We immobilized the preassembled and  
113 *TmFtsH*<sub>184,513</sub>-filled vesicles on a polyethylene glycol (PEG)–biotin-coated chamber via a  
114 biotin–neutravidin–biotin sandwich and performed real-time imaging of fluorescently-labeled  
115 single molecules with a prism-based total internal reflection fluorescence (TIRF) microscope  
116 [31,32].

117

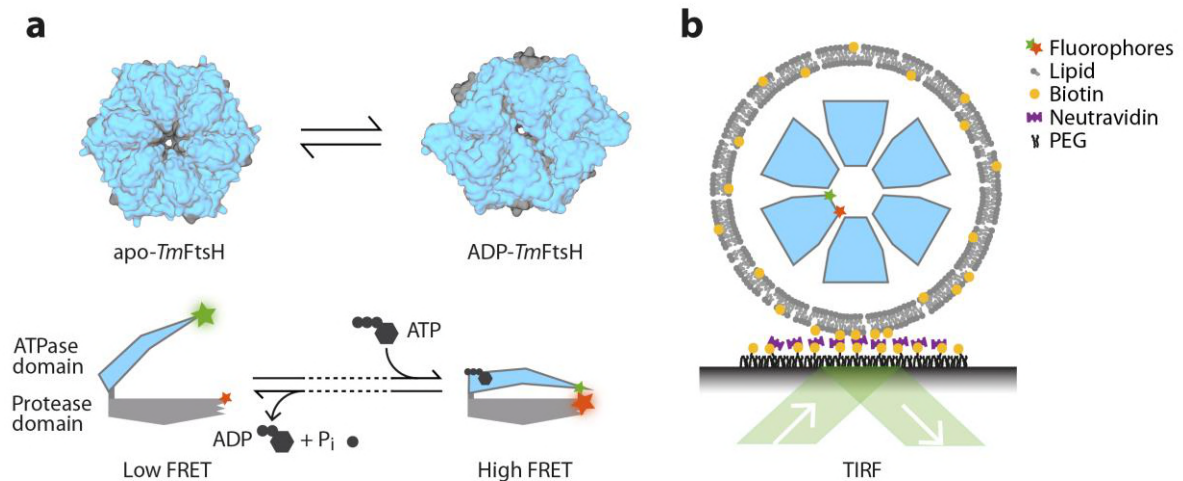

118

119 **Figure 1. ATPase and protease inter-domain movements in *TmFtsH* probed by**  
120 **smFRET.** a) Schematics of large-scale conformational changes in *TmFtsH*. Upper  
121 panel: surface representation of hexameric *TmFtsH* in its apo- (left, pdb: 3kds) and ADP-  
122 bound state (right, pdb: 2cea) [18,19]. The protease and ATPase domains are colored in  
123 gray and blue, respectively. Visualization was performed in VMD [33]. Lower  
124 panel: Schematic of monomer subunit domain conformational changes between an open  
125 and a closed state upon ATP binding and hydrolysis as suggested from crystal-structure  
126 analysis of *TmFtsH*. The positions used for labeling with donor (Cy3, green star) and  
127 acceptor fluorophores (Cy5, red star) in *TmFtsH*<sub>184,513</sub> are indicated. b) Experimental

128 design of the smFRET assay. Double-labeled *TmFtsH*<sub>184,513</sub> monomers were self-  
129 assembled in presence of unlabeled *TmFtsH* to hexamers in DMPC lipid vesicles  
130 containing a small fraction of biotin-DPPE. Lipid vesicles were surface-immobilized via  
131 a biotin–streptavidin–biotin sandwich and *TmFtsH* domain conformational changes were  
132 monitored by smFRET TIRF microscopy.

133

#### 134 **Apo-*TmFtsH* undergoes sequential transitions between five conformational states**

135 In a first set of experiments, we investigated conformational changes of *TmFtsH*<sub>184,513</sub> in the  
136 absence of ATP. Donor ( $I_D$ ) and acceptor ( $I_A$ ) fluorescence intensities from assembled hexamers  
137 in lipid vesicles were recorded for tens of seconds at ten frames per second (Fig. 2a). smFRET  
138 time trajectories were extracted by calculating the apparent FRET efficiencies  
139 ( $E_{app} = I_A / (I_D + I_A)$ ) for each collected data point. Only trajectories exhibiting single bleaching  
140 steps of both the donor and acceptor fluorophore were investigated to ensure that FRET  
141 efficiency changes arise only from single donor–acceptor labeled monomers and not from  
142 multiple co-encapsulated labeled subunits. The donor and acceptor fluorescence time traces  
143 showed anti-correlated signals fluctuations between low and high intensity (Fig. 2a), which  
144 translate into highly dynamic FRET efficiency changes (Fig. 2b) revealing that *TmFtsH*<sub>184,513</sub>  
145 exhibits inter-domain movements between the ATPase and protease domain on the second  
146 timescale. Based on the structural data, we expected a constant low FRET efficiency in absence  
147 of ATP, however, the large distinct changes between  $E_{min} \approx 0.2$  and  $E_{max} \approx 0.9$  observed in the  
148 smFRET time trajectories indicate a large hinge-bending motion in the range of ~3–4 nm  
149 between the two domain tips. FRET efficiency histograms from individual time traces (Fig. 2b,  
150 right panel) as well as a cumulative FRET efficiency histogram from all trajectories ( $n = 108$ )  
151 resulted in a broad distribution, further supporting that the ATPase and protease domains of  
152 *TmFtsH*<sub>184,513</sub> dynamically interconvert between multiple states in absence of ATP.

153 To resolve the number of states adopted by *TmFtsH*<sub>184,513</sub> and to derive kinetic information on  
154 inter-domain switching, we analyzed the obtained smFRET time trajectories by global Hidden  
155 Markov modelling using ebFRET [34] (Fig. 2c). This analysis revealed that smFRET time  
156 traces are best described by five distinct conformational states, as indicated by the minimum in  
157 an unbiased global Bayesian Information Criterion (BIC) function (Fig. 2d). A Viterbi path  
158 reconstruction of the entire set of time trajectories using a five-state model excellently  
159 reproduced the experimental smFRET trajectories (Fig. 2c, left panel and Fig. S7 for more  
160 example data) and allowed us to extract state dwell times and kinetic rates. A histogram created  
161 from the reconstructed Viterbi paths covered the full distribution of underlying conformational



162 states (Fig. 2c, right panel), substantiating that the conformational switching of *TmFtsH*<sub>184,513</sub> is  
163 well described by five dynamically interconverting states. A rate matrix (Fig. 2e) generated for  
164 all closing and opening transitions revealed that transitions between neighboring states (e.g.,  
165 state 1 to state 2) are much more frequently observed than transitions between other states (e.g.,  
166 state 1 to state 4), indicating that conformational switching of *TmFtsH*<sub>184,513</sub> occurs primarily in  
167 a sequential manner to the nearest neighbor state. A graphical representation summarizing the  
168 relative occupancies and kinetic rates for opening and closing transitions between the nearest  
169 neighbor states is shown in Figure 3a.

170

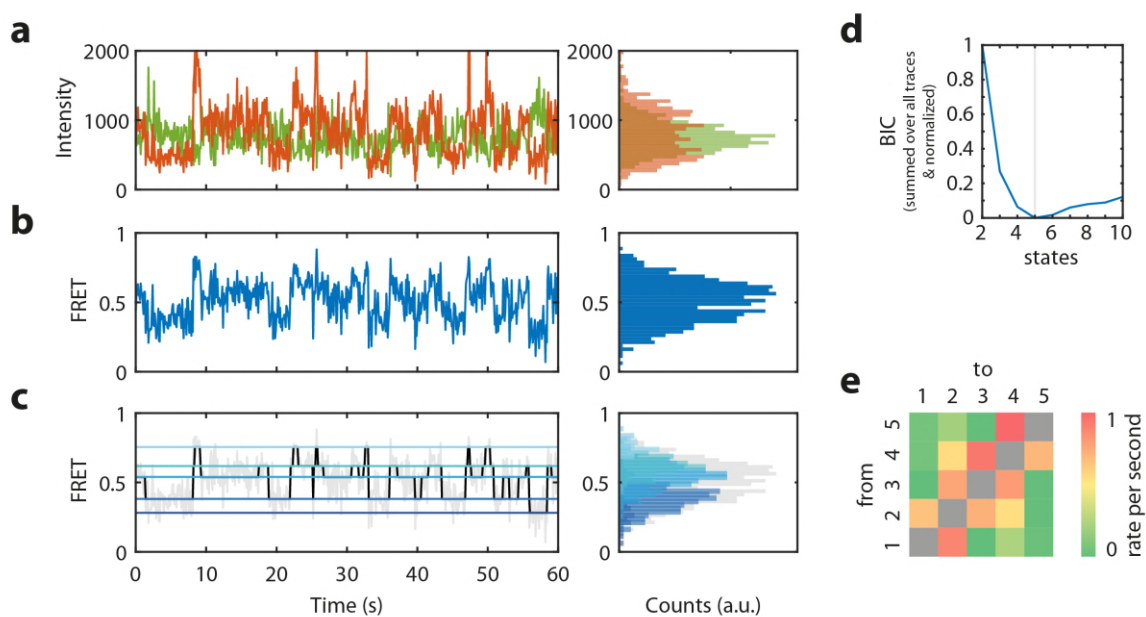

171

## 172 **Figure 2. Opening and closing of the *TmFtsH* domains in the absence of ATP.**

173 a) Representative donor and acceptor fluorescence intensity time trajectories (left panel)  
174 and their distributions (right panel). b) smFRET time trajectory (left panel) constructed  
175 from (a) and the derived FRET efficiency histogram (right panel) c) Viterbi path  
176 reconstruction of the smFRET time trajectory in (b) using a five-state model (left panel)  
177 and the derived histogram (right panel) d) Global BIC function. e) Heatmap of all  
178 conformational transition rates of *TmFtsH*<sub>184,513</sub> in the absence of ATP.

179

## 180 **ATP shifts the population equilibrium towards a more compacted state**

181 In a next step, we wanted to test whether the presence of ATP has an influence on the  
182 conformational dynamics of *TmFtsH*, as ATP has been inferred from crystallographic studies  
183 to influence the chemo-mechanical state [19]. To this end, we performed smFRET  
184 measurements on *TmFtsH*<sub>184,513</sub> in the presence of 1 mM ATP. Similar to our observations

185 without ATP, smFRET time trajectories showed large fluctuations between multiple states on  
186 the second timescale (Figs. S4a,b and S7b for more example data). A FRET efficiency  
187 histogram created from all trajectories exhibits a broad distribution, indicating again a large  
188 opening and closing motion of both domains ranging from  $E_{\min} \approx 0.3$  to  $E_{\max} \approx 0.9$  (Fig. S4b).  
189 Interestingly, the FRET efficiency distribution is skewed to slightly higher FRET efficiencies  
190 compared to *TmFtsH*<sub>184,513</sub> in the absence of ATP. This indicates that *TmFtsH* assumes a more  
191 compact conformation when ATP is present. To shed light on whether this apparent shift is  
192 caused by a repopulation of FRET states or a shift of FRET states towards higher FRET  
193 efficiencies, we analyzed the time trajectories using Hidden Markov modelling ( $n = 17$   
194 trajectories). As seen for the experiments without ATP, we found conformational transitions  
195 between five states indicated by the minimum in the BIC function (Fig. S4d). Moreover,  
196 transitions also occurred most frequently between direct neighboring conformational states,  
197 which exhibited the highest transition rates (Fig. S4e). The FRET efficiency states in the  
198 absence and presence of ATP agree well within error, indicating that similar molecular states  
199 are adopted under both conditions (Fig. S4c). However, we observed state population  
200 probabilities shifting to a higher population of state 3 as compared to the absence of ATP  
201 (Fig. 3b). Thus, while the timescale of interstate conversion is similar, the equilibrium of states  
202 is shifted. A higher closing-to-opening ratio between states 1 and 2 and state 2 and 3 in the  
203 presence of ATP leads to a depopulation of state 1 and, thus, an increased net probability of the  
204 third conformational state. In total, *TmFtsH*<sub>184,513</sub> spent 37% of its time in state 3 in the presence  
205 of ATP compared to 28% in absence of ATP. Interestingly, the kinetic ratios between state 3  
206 and 4 and state 4 and 5 are similar although absolute numbers vary, thus indicating that ATP  
207 does not affect the equilibrium of these transitions to a great extent. Furthermore, we observed  
208 that populating state 1 in presence of ATP occurred only in rare cases leading to a 7% occupancy  
209 probability (vs. 17% FRET state population without ATP). Taken together, the re-equilibrations  
210 explain the overall shift of the open conformational states 1 and 2 towards a more compact  
211 conformation in state 3 in the presence of ATP.

212



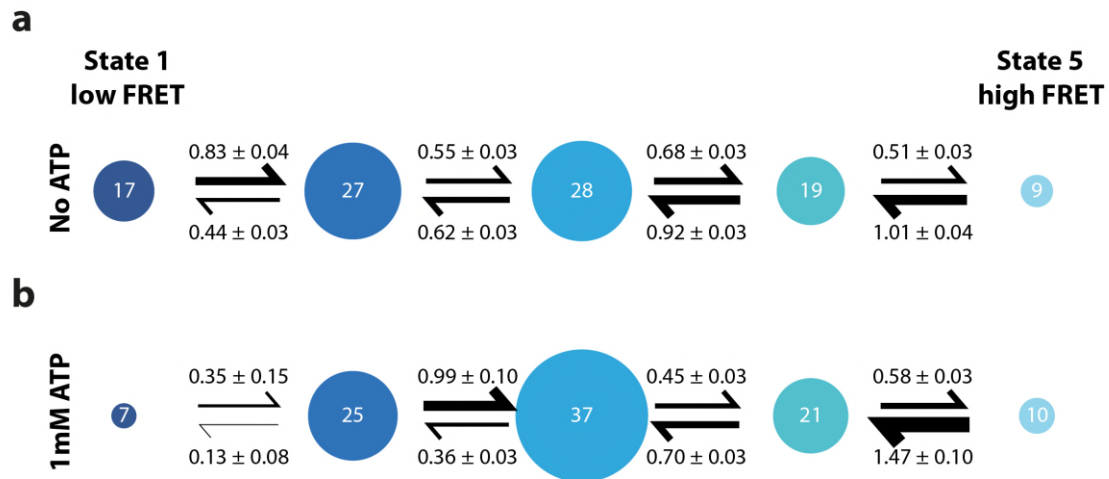

213

214 **Figure 3. *TmFtsH*<sub>184,513</sub> sequential conformational switching without and with ATP.**

215 Occupancies (%) and kinetic rates (per second) of *TmFtsH*<sub>184,513</sub> without (a) and with  
216 1 mM ATP (b). Size of states and thickness of arrows scale with the occupancy  
217 probabilities and kinetic rates, respectively. State occupancies showed an error <3%.

218

### 219 **A pathogenic mutation of the human homolog paraplegin hinders *TmFtsH* compaction**

220 The human homolog of *TmFtsH*, paraplegin (SPG7), shares 53% structural identity and >70%  
221 similarity with *TmFtsH* [23] (Fig. S3). The pathogenic mutation of paraplegin A510V is  
222 associated with the autosomal recessive form of HSP, causing progressive spastic paralysis in  
223 the lower limbs [20]. Yet, its molecular effects remain elusive. A510V is highly conserved and  
224 located at the hinge interface between the ATPase and protease domains, however, it is far from  
225 both active sites [23] and still impairs the function of paraplegin [35]. Hence, we wanted to  
226 address if the malfunction caused by the mutation of the *TmFtsH*-homolog arises from a  
227 structural or dynamic deficiency. To this end, we introduced the paraplegin A510V-  
228 homologous mutation A359V in *TmFtsH*<sub>184,513</sub> and created fluorescently labeled mutant protein,  
229 thereafter named *TmFtsH*<sub>184,513</sub>-A359V. In functional assays, the A359V mutation did not alter  
230 ATPase and protease activities compared to *TmFtsH*<sub>184,513</sub> (Figs. S1 and S2, respectively). We  
231 hexamerized *TmFtsH*<sub>184,513</sub>-A359V in lipid vesicles and performed smFRET measurements  
232 both in the absence and presence of ATP. smFRET time trajectories showed similar transitions  
233 between multiple discrete states as observed for *TmFtsH*<sub>184,513</sub>, revealing that the highly  
234 dynamic switching between multiple states on the second timescale is preserved in  
235 *TmFtsH*<sub>184,513</sub>-A359V (Figs. S5a,b, S6a,b). The dynamic behavior resulted also in broad  
236 distributions in the cumulative smFRET efficiency histograms ranging between  $E_{\min} = 0.2$  and  
237  $E_{\max} = 0.9$  (Figs. S5b, S6b). We analyzed all smFRET trajectories using Hidden Markov

238 modelling, which revealed five conformational states as observed for *TmFtsH*<sub>184,513</sub>, both in the  
239 absence and presence of ATP (Figs. S5c, S6c, S7c,d) and with a preferential switching between  
240 neighboring states (Figs. S5d, S6d). In the absence of ATP, the overall state occupancy  
241 distribution of *TmFtsH*<sub>184,513</sub>-A359V is largely unaffected by the point mutation (Fig. 4a) when  
242 compared to *TmFtsH*<sub>184,513</sub>. However, a different behavior between *TmFtsH*<sub>184,513</sub>-A359V and  
243 *TmFtsH*<sub>184,513</sub> is observed in the presence of ATP (Fig. 4b). While *TmFtsH*<sub>184,513</sub>-A359V also  
244 undergoes switching on the second timescale, ATP does not induce the overall compaction of  
245 *TmFtsH* towards the conformational state 3 as observed in *TmFtsH*<sub>184,513</sub> (c.f. Fig. 3b). Instead,  
246 the equilibria between states 1 to 3 were largely unchanged in presence of ATP. This suggests  
247 that the conformational switch towards a more closed conformational state in presence of ATP  
248 is inhibited in mutant *TmFtsH*<sub>184,513</sub>-A359V.  
249

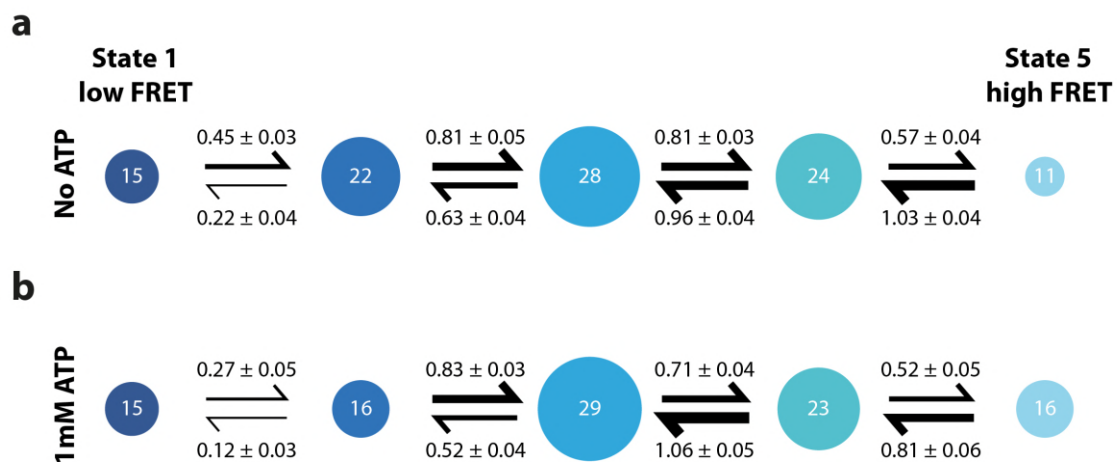

250

251 **Figure 4. *TmFtsH*<sub>184,513</sub>-A359V sequential conformational switching without and**  
252 **with 1 mM ATP.** Occupancies (%) and kinetic rates (per second) of *TmFtsH*<sub>184,513</sub>-  
253 A359V without (a) and with 1 mM ATP (b). Size of states and thickness of arrows scale  
254 with the occupancy probability and kinetic rate, respectively. State occupancies showed  
255 an error <3%.

256

## 257 Discussion

258 Resolving the inter-domain conformational changes of *TmFtsH* is an essential step towards  
259 elucidating its proteolysis mechanism. Previous crystallographic studies on *TmFtsH* indicated  
260 that binding of ADP drives a large conformational transition from an open state in the apo form  
261 to a closed state, in which the ATPase domain is closely associated with the protease domain  
262 [10,18,19]. A model of the chemo-mechanical cycle was inferred from these two crystal

263 structures, describing *TmFtsH*'s function with a power-stroke mechanism, whereby the energy  
264 released by ATP hydrolysis is converted into a conformational switch. While these structures  
265 granted Ångström-resolved snapshots of two distinct conformers of the protease, they did not  
266 reveal the connectivity between the states nor provided time trajectories of structural changes  
267 and their coupling to ATP binding.

268 In this work, we established a kinetic view on *TmFtsH*'s ATPase and protease inter-domain  
269 switch by using time-resolved smFRET to monitor the unsynchronized domain movements of  
270 *TmFtsH* monomers within self-assembled hexamers. We found that *TmFtsH* is a highly  
271 dynamic protease, even in the absence of nucleotide, and undergoes sequential, thermally-  
272 driven closing and opening motions through five discrete conformational states with an  
273 occupancy on the second timescale. The observed amplitude of the conformational switch  
274 between the two domain tips spans a length scale of ~3–4 nm and is thus consistent with the  
275 large-scale hinge-bending motion seen in the crystal structures. Yet, the three additional  
276 conformational states, as witnessed by our single-molecule time trace analysis, indicate a much  
277 more complex structural reorganization than implied by the two-state picture inferred from the  
278 crystallographic snapshots.

279 In the presence of ATP, *TmFtsH* also performs highly dynamic switching between five different  
280 states on the second timescale but the protease undergoes an inter-domain compaction caused  
281 by a depopulation of the open state towards a more closed state. While compaction is in line  
282 with the closing action implied by the model derived from the crystal structure upon ADP  
283 binding, the thermally driven and, thus, weakly ATP-coupled inter-domain movement behavior  
284 markedly differs from the existing conformational model, in which dynamic switching of  
285 *TmFtsH* was described to be purely driven by energy conversion from ATP. Our kinetic data  
286 rather suggest a model (Fig. 5a) in which thermal energy, but not chemical energy derived from  
287 ATP, provides the major driving force of the conformational fluctuations, while ATP, through  
288 a state reequilibration, introduces directionality into these thermal domain motions. Support for  
289 a weakly ATP-coupled inter-domain reconfiguration model comes from a comparison of  
290 *TmFtsH*'s ATP consumption rates and its conformational transition rates. The ATPase activity  
291 of *TmFtsH*<sub>184,513</sub> with  $7 \times 10^{-4}$  ATP/monomer/s is significantly slower than the second timescale  
292 inter-domain conformational dynamics observed in our smFRET experiments, both without and  
293 with ATP, thus substantiating the notion that ATP itself might not be an important driver in  
294 conformational changes of *TmFtsH* in its chemo-mechanical cycle.

295 A largely energy-independent or weakly ATP-coupled conformational switching mechanism  
296 resembles previous work on the dimeric ATPase chaperone Hsp90 [36], where conformational  
297 changes between different states of the protein were found to result from thermal fluctuations  
298 rather than from the release of chemical energy upon ATP hydrolysis. Low lying energy barriers  
299 on the order of a few  $k_B T$ s together with multiple discrete conformational states were suggested  
300 to drive the conformational changes sequentially in Hsp90. Such a mechanism might also be at  
301 play in *TmFtsH* and explain how thermal fluctuations are sufficient for *TmFtsH* to drive  
302 sequential transitions from one state to a neighbor state, thus not necessitating ATP energy  
303 conversion for its domain fluctuations.

304 From a functional point of view, the mechanism of thermally-induced conformational switching  
305 in *TmFtsH* may be of importance for its unfoldase or translocase activity. By severing the large  
306 conformational switching into small transitions, the partial thermally-unfolded protein substrate  
307 bound at the ATPase domain of *TmFtsH* could be transferred to the proteolytic domain, similar  
308 to previous reports of thermal ratchets [37,38], while ATP might aid in establishing  
309 directionality in this process. Even though conformational switching appears largely  
310 independent of energy use, we speculate that ATP hydrolysis might be required for unfolding  
311 of mechanically stable substrates, as recently observed for the bacterial ClpXP system and I27  
312 as well as green fluorescent protein (GFP) unfolding [6,8,39–41].

313

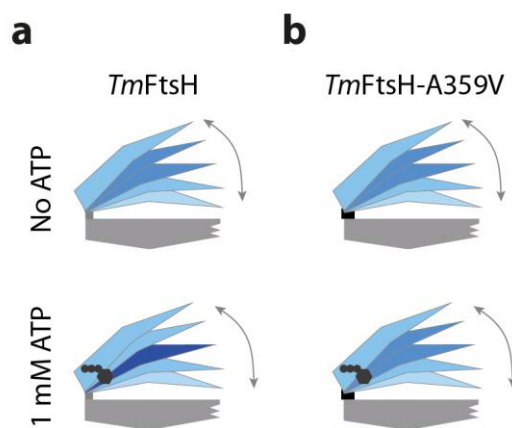

314

315 **Figure 5. Model of thermally-driven domain motions in *TmFtsH* and the effect of**  
316 **hindered movement upon introduction of a pathological hinge point mutation.**  
317 a) *TmFtsH* and b) *TmFtsH*-A359V without ATP (upper panel) and with 1 mM ATP  
318 (bottom panel). Blue scaling of the ATPase domain indicates occupancies of the  
319 conformational state, with a darker color indicating a higher occupied state.

320

321 The thermally-driven domain motions in *TmFtsH* suggest an important role of the hinge  
322 interface connecting the ATPase and protease domain in mediating the conformational switch,  
323 which might be disturbed when mutations are introduced. To address this question, we studied  
324 the conformational dynamics of *TmFtsH* carrying the A359V mutation, a hinge point mutation  
325 which is homologous to the HSP-pathogenic mutation of paraplegin A510V [20,23]. We found  
326 that *TmFtsH*-A359V also performs switching between five different conformational states with  
327 thermally driven interconversion on the seconds timescale. However, *TmFtsH*-A359V did not  
328 show the characteristic compaction towards state 3 upon addition of ATP as seen in *TmFtsH*,  
329 but exhibited, within error, unchanged population occupancies of its five states. With  $4 \times 10^{-4}$   
330 ATP/hexamer/s, the point mutation itself did not significantly alter the ATPase activity of  
331 *TmFtsH*<sub>184,513</sub>-A359V. Thus, we speculate that the mutation A359V might hinder an allosteric  
332 communication upon ATP binding or hydrolysis as the molecule is ‘locked’ in a more open  
333 state than could be evoked by ATP binding or hydrolysis. We anticipate that this hindered  
334 communication could also be the molecular cause of the malfunction in the human paraplegin  
335 A510V mutation (Fig. 5b).

336 Whereas the presence of substrate stimulates ATP hydrolysis (Fig. S1), it remains unknown if  
337 substrate binding would change the occupancies of the molecular conformations or the dynamic  
338 behavior of domain motions and their ATP coupling behavior. Further smFRET experiments  
339 using different protease substrates with both *TmFtsH* and *TmFtsH*-A359V should shed light on  
340 the existence of a substrate-induced energy-coupled mechanism of degradation and potentially  
341 further malfunctions of pathogenic mutations. Noteworthy, our results, together with earlier  
342 work that reported ATP-independent proteolytic activity of *TmFtsH*—which we also observed  
343 with the weakly folded protein substrate casein for *TmFtsH*<sub>184,513</sub> (Fig. S2)—indicate the  
344 possibility that the proteolytic activity could be decoupled from ATPase activity. Thus, it  
345 remains to be explored how *TmFtsH* could use a dual mechanism for processing its protein  
346 substrates: one ATP dependent and one ATP independent.

347 In conclusion, we found that conformational changes between the ATPase and the protease  
348 domain of *TmFtsH* are driven by thermal motions and only weakly coupled to ATP. *TmFtsH*  
349 adopts five discrete, well-defined states during closing and opening cycles, which remain to be  
350 structurally resolved. The presence of ATP favors compaction of *TmFtsH* with higher  
351 occupancy of state 3 along the closing cycle, yet all five conformational states are frequently  
352 adopted by *TmFtsH*. Introducing a mutation in the hinge interface of *TmFtsH*, homologous to a  
353 human pathogenic mutation of paraplegin causing HSP, prevents the compaction observed by

354 the ATPase and protease domains of *TmFtsH*, a perturbation that might explain the pathogenic  
355 activity of the human homolog paraplegin causing HSP.

## 356 **Materials and Methods**

357 **Protein design, production, and purification.** The cDNA sequence corresponding to amino  
358 acid residues 147–610 of *TmFtsH* was inserted between the NcoI and NotI sites of a pET28a(+)  
359 vector (Novagen) to encode an N-terminal His<sub>6</sub>-tagged *TmFtsH* fusion protein lacking the  
360 transmembrane domain ( $\Delta$ tm) of *TmFtsH* (His<sub>6</sub>-( $\Delta$ tm)*TmFtsH*(147–610)), as described in  
361 Bieniossek et al. [18,19]. A plasmid encoding a double Cys variant (*TmFtsH*<sub>184,513</sub>) of His<sub>6</sub>-  
362 ( $\Delta$ tm)*TmFtsH*(147–610) for site-specific labeling with thiol-reactive fluorophores at positions  
363 184 and 513 was created by introducing a non-native Cys at position 184 and by replacing the  
364 two native Cys residues at positions 255 and 564 by Ser residues to prevent unspecific labeling.  
365 The expression vector encoding the mutant *TmFtsH*<sub>184,513</sub>-A359V variant was generated from  
366 the *TmFtsH*<sub>184,513</sub> plasmid by an Ala-to-Val replacement at position 359. Mutations were  
367 introduced using the QuikChange Lightning Multi site-directed mutagenesis kit (Novagen).  
368 Target mutations in all constructs were confirmed by DNA sequencing.

369 Recombinant production of *TmFtsH*<sub>184,513</sub> and *TmFtsH*<sub>184,513</sub>-A359V fusion proteins was  
370 performed using the *Escherichia coli* host strain BL21(DE3) (Novagen). Briefly, bacterial cells  
371 were transformed with the respective *TmFtsH*<sub>184,513</sub>- or *TmFtsH*<sub>184,513</sub>-A359V-encoding  
372 pET28a(+) expression vector and grown in Luria-Bertani medium (supplemented with  
373 50  $\mu$ g/ml Kanamycin) to an optical density at 600 nm (OD<sub>600</sub>) of ~0.6. Expression was induced  
374 by the addition of isopropyl- $\beta$ -D-1-thiogalactopyranoside (IPTG) to a final concentration of  
375 0.5 mM and cells cultivated for a further 3 h at 37°C. Cells were harvested by centrifugation  
376 and lysed using an Emulsiflex high-pressure homogenizer (Avestin). The soluble crude extract  
377 was then separated from the cell debris and insoluble content by centrifugation for 40 min at  
378 40,000 rpm at 4°C. The supernatant was subjected to heat purification at 75°C for 3 min,  
379 followed by subsequent centrifugation for 10 min at 40,000 rpm and 4°C, according to  
380 previously published procedures [18,19].

381 Protein purification was performed via immobilized-metal-ion affinity chromatography  
382 (IMAC). Briefly, the soluble fraction of the cell lysate was applied to a HisTrap FastFlow  
383 column (GE Healthcare) that had been pre-equilibrated with binding buffer (20 mM HEPES  
384 pH 8.0, 300 mM NaCl, 10 mM imidazole). After extensive washing with washing buffer  
385 (20 mM HEPES pH 7.5, 300 mM NaCl, 40 mM imidazole), his-tagged proteins were eluted  
386 with elution buffer (20 mM HEPES pH 7.5, 300 mM NaCl, 250 mM imidazole).



387 **ATPase and protease activity assays.** ATPase activities of *TmFtsH*<sub>184,513</sub> and *TmFtsH*<sub>184,513-</sub>  
388 A359V were tested using the EnzChek Phosphate Assay kit (Thermo Fisher) according to the  
389 manufacturer's instructions. Absorption was monitored at 360 nm (Fig. S1) after successively  
390 adding ATP (1 mM), cI-ssrA substrate (0.8 μM) and *TmFtsH*<sub>184,513</sub> (14.4 μM) or *TmFtsH*<sub>184,513-</sub>  
391 A359V (14.4 μM) to the blank buffer solution containing 20 mM HEPES pH 8.0, 150 mM KCl,  
392 10% glycerol, 5 mM MgOAc, 12.5 μM ZnOAc. The cI-ssrA substrate, an N-terminal His<sub>6</sub>-  
393 tagged and C-terminal ssrA-tagged (AANDENYALAA) repressor protein cI fusion protein,  
394 was recombinantly produced in *E. coli* from a pET28(+) vector and purified by IMAC, followed  
395 by dialysis against buffer (20 mM HEPES pH 8.0, 150 mM KCl, 10% glycerol).

396 Protease activity tests of *TmFtsH*<sub>184,513</sub> and *TmFtsH*<sub>184,513-A359V</sub> were carried out by incubating  
397 2.4 μM protease sample with various combinations of 1 mM casein, 1 mM ATP and 1 mM  
398 EDTA overnight at 24°C and 50°C in buffer containing 20 mM HEPES pH 8.0, 150 mM KCl,  
399 10% glycerol, 5 mM MgOAc, 12.5 μM ZnOAc. Protease activity was monitored by substrate  
400 degradation using sodium dodecyl sulfate polyacrylamide gel electrophoresis (SDS-PAGE)  
401 (Fig. S2). Casein stock solution (0.65% (w/v)) was prepared by dissolving bovine casein  
402 (Sigma) in buffer containing 50 mM HEPES pH 8.0.

403 **Protein labeling.** *TmFtsH*<sub>184,513</sub> and *TmFtsH*<sub>184,513-A359V</sub> were labeled with maleimide-  
404 functionalized sulfo-Cy3 and sulfo-Cy5 dyes (both from GE Healthcare). Purified *TmFtsH*<sub>184,513</sub>  
405 or *TmFtsH*<sub>184,513-A359V</sub> at a final concentration of 20 μM were reacted with a 10–15-fold  
406 excess of both dyes under reducing conditions (0.4 mM tris(2-carboxyethyl)phosphine (TCEP))  
407 in buffer containing 20 mM HEPES pH 7.5, 300 mM NaCl, 250 mM imidazole. The labeling  
408 reaction was carried out for 2 h at room temperature, followed by overnight incubation at 4°C.  
409 Labeled protein was separated from the unreacted dyes by IMAC using a spin-column  
410 purification protocol. Briefly, after diluting the labeling reaction tenfold in binding buffer  
411 (20 mM HEPES pH 8.0, 300 mM NaCl, 10 mM imidazole), the solution was applied to a Ni-  
412 NTA Agarose resin (Thermo Fisher) that had been pre-equilibrated with binding buffer. After,  
413 extensive spin-washing at 2,000 rpm with binding buffer until the supernatant was clear and  
414 free of residual dyes, the labeled protein was eluted with elution buffer (20 mM HEPES pH 8.0,  
415 300 mM NaCl, 250 mM imidazole) by centrifugation for 2 min at 2,000 rpm. Labeling  
416 efficiency was determined photometrically.

417 **Sample preparation for single-molecule FRET experiments.** DMPC and biotin-DPPE lipid  
418 powders (both from Avanti Polar Lipids) were dissolved in chloroform and mixed in a 99:1  
419 DMPC:biotin-DPPE ratio at a final concentration of 5 mg/ml. Solvent was subsequently

420 removed by vacuum drying overnight to yield a dried lipid cake. In a separate step, labeled  
421 *TmFtsH*<sub>184,513</sub> was mixed with unlabeled *TmFtsH*<sub>184,513</sub> in a 1:5 ratio at a final protein  
422 concentration of 12  $\mu$ M in buffer (20 mM HEPES pH 8.0, 150 mM KCl, 10% glycerol, 5 mM  
423 MgOAc, 12.5  $\mu$ M ZnOAc) using labeled and unlabeled protein from the same purification  
424 batch. The protein mix was then added to the dried lipid cake and incubated at 37°C for 30 min.  
425 After addition of additional buffer (20 mM HEPES pH 8.0, 150 mM KCl, 10% glycerol, 5 mM  
426 MgOAc, 12.5  $\mu$ M ZnOAc), protein encapsulation into unilamellar lipid vesicles was performed  
427 by 35-fold extrusion of the protein–lipid suspension through polycarbonate filters with a pore  
428 diameter of 200 nm using a Mini-Extruder (Avanti Polar Lipids) at 37°C according to the  
429 manufacturer’s instructions. *TmFtsH*<sub>184,513</sub>-loaded vesicles were then immobilized on a  
430 biotinylated PEG-coated flow chamber via a biotin–neutravidin–biotin sandwich. Before  
431 single-molecule imaging, the sample chamber was supplemented with imaging buffer (20 mM  
432 HEPES pH 8.0, 100 mM NaCl, 5 mM MgOAc, 12.5  $\mu$ M ZnOAc) containing saturated, aged  
433 Trolox (6-hydroxy-2,5,7,8-tetramethylchroman-2-carboxylic acid, Sigma) and an oxygen  
434 scavenging system (100  $\mu$ g/ml glucose oxidase, 0.8% (w/v) D-glucose, and 1  $\mu$ U/ml catalase).  
435 For measurements in the presence of ATP, 1 mM ATP was added to the imaging buffer  
436 solution. Because the transition temperature of DMPC is at room temperature (~24°C)—the  
437 temperature at which our experiments were performed—coexistence of liquid and gel phases  
438 of the lipids permeabilizes the membrane for exchanging small molecules such as ATP [30].  
439 Sample preparation for experiments with *TmFtsH*<sub>184,513</sub>-A359V was carried out in the same  
440 way.

441 **Single-molecule FRET experiments.** A custom-built prism-type TIRF microscope was used  
442 for single-molecule data acquisition as previously described [31,32,42]. Imaging was  
443 performed at room temperature. Single-molecules donor and acceptor intensities ( $I_D$ ,  $I_A$ ) were  
444 recorded over time at 100-ms time resolution and smFRET time trajectories were extracted by  
445 calculating  $E_{app}$  for each collected data point (see Results). Distances ( $r$ ) were approximated on  
446 the basis of the Förster equation,  $r = R_0 \times (1/(E - 1))^{1/6}$ , where  $E$  is the corrected FRET  
447 efficiency, and  $R_0$  is the Förster distance of the Cy3/Cy5 FRET pair ( $R_0 = 5$  nm), with the  
448 assumption that the fluorophores can freely rotate at the labeling site. Only traces that exhibited  
449 single donor and acceptor bleaching steps were evaluated. Hidden-Markov model analysis was  
450 performed using ebFRET as described [34] (<https://ebfret.github.io>).

451 **Acknowledgements**

452 We thank all members of the Schlierf lab for discussions. In particular, the authors would like  
453 to thank Andreas Hartmann for help in data acquisition and establishing data analysis software.  
454 This study was supported by the German Ministry for Science and Education BMBF (grant  
455 03Z2EN11 to MS), the Deutsche Forschungsgemeinschaft (grants SCHL1896/2-1 and  
456 SCHL1896/3-1 to MS) and Stipendienstiftung Rheinland-Pfalz with a scholarship to GK.

457 **Author contributions**

458 MS and MR conceived experiments, MR performed experiments, PG provided analytical tools;  
459 all authors analyzed and interpreted data; MR, GK and MS wrote the manuscript; all authors  
460 discussed results and commented on the manuscript.

461 **Conflict of interest**

462 The authors declare no conflict of interest.

463 **References**

- 464 1. Morimoto RI, Selkoe DJ, Kelly JW (2012) *Protein homeostasis*. Cold Spring Harbor  
465 Laboratory Press, Cold Spring Harbor.
- 466 2. Sauer RT, Baker TA (2011) AAA+ proteases: ATP-fueled machines of protein  
467 destruction. *Annu Rev Biochem* **80**: 587–612.
- 468 3. Gerdes F, Tatsuta T, Langer T (2012) Mitochondrial AAA proteases — Towards a  
469 molecular understanding of membrane-bound proteolytic machines. *Biochim Biophys*  
470 *Acta - Mol Cell Res* **1823**: 49–55.
- 471 4. Hanson PI, Whiteheart SW (2005) AAA+ proteins: have engine, will work. *Nat Rev*  
472 *Mol Cell Biol* **6**: 519–529.
- 473 5. White SR, Lauring B (2007) AAA+ ATPases: achieving diversity of function with  
474 conserved machinery. *Traffic* **8**: 1657–1667.
- 475 6. Cordova JC, Olivares AO, Shin Y, Stinson BM, Calmat S, Schmitz KR, Aubin-Tam  
476 M-E, Baker TA, Lang MJ, Sauer RT (2014) Stochastic but highly coordinated protein  
477 unfolding and translocation by the ClpXP proteolytic machine. *Cell* **158**: 647–658.
- 478 7. Olivares AO, Kotamarthi HC, Stein BJ, Sauer RT, Baker TA (2017) Effect of  
479 directional pulling on mechanical protein degradation by ATP-dependent proteolytic  
480 machines. *Proc Natl Acad Sci U S A* **114**: E6306–E6313.

- 481 8. Yang Y, Guo R, Gaffney K, Kim M, Muhammednazaar S, Tian W, Wang B, Liang J,  
482 Hong H (2018) Folding-Degradation Relationship of a Membrane Protein Mediated by  
483 the Universally Conserved ATP-Dependent Protease FtsH. *J Am Chem Soc* **140**: 4656–  
484 4665.
- 485 9. Neuwald AF, Aravind L, Spouge JL, Koonin E V. (1999) AAA+: A class of  
486 chaperone-like ATPases associated with the assembly, operation, and disassembly of  
487 protein complexes. *Genome Res* **9**: 27–43.
- 488 10. Langklotz S, Baumann U, Narberhaus F (2012) Structure and function of the bacterial  
489 AAA protease FtsH. *Biochim Biophys Acta* **1823**: 40–48.
- 490 11. Ito K, Akiyama Y (2005) Cellular functions, mechanism of action, and regulation of  
491 FtsH protease. *Annu Rev Microbiol* **59**: 211–231.
- 492 12. Turk B (2006) Targeting proteases: successes, failures and future prospects. *Nat Rev*  
493 *Drug Discov* **5**: 785–799.
- 494 13. Rugarli EI, Langer T (2012) Mitochondrial quality control: a matter of life and death  
495 for neurons. *EMBO J* **31**: 1336–1349.
- 496 14. Bulteau A-L, Bayot A (2011) Mitochondrial proteases and cancer. *Biochim Biophys*  
497 *Acta* **1807**: 595–601.
- 498 15. Levytskyy RM, Germany EM, Khalimonchuk O (2016) Mitochondrial Quality Control  
499 Proteases in Neuronal Welfare. *J Neuroimmune Pharmacol* **11**: 629–644.
- 500 16. Rugarli EI, Langer T (2006) Translating m-AAA protease function in mitochondria to  
501 hereditary spastic paraplegia. *Trends Mol Med* **12**: 262–269.
- 502 17. Licht S, Lee I (2008) Resolving individual steps in the operation of ATP-dependent  
503 proteolytic molecular machines: from conformational changes to substrate translocation  
504 and processivity. *Biochemistry* **47**: 3595–3605.
- 505 18. Bieniossek C, Schalch T, Bumann M, Meister M, Meier R, Baumann U (2006) The  
506 molecular architecture of the metalloprotease FtsH. *Proc Natl Acad Sci U S A* **103**:  
507 3066–3071.
- 508 19. Bieniossek C, Niederhauser B, Baumann UM (2009) The crystal structure of apo-FtsH  
509 reveals domain movements necessary for substrate unfolding and translocation. *Proc*  
510 *Natl Acad Sci U S A* **106**: 21579–21584.
- 511 20. Sánchez-Ferrero E, Coto E, Beetz C, Gámez J, Corao AI, Díaz M, Esteban J, del

- 512 Castillo E, Moris G, Infante J, et al. (2013) SPG7 mutational screening in spastic  
513 paraplegia patients supports a dominant effect for some mutations and a pathogenic  
514 role for p.A510V. *Clin Genet* **83**: 257–262.
- 515 21. Roxburgh RH, Marquis-Nicholson R, Ashton F, George AM, Lea RA, Eccles D,  
516 Mossman S, Bird T, van Gassen KL, Kamsteeg E-J, et al. (2013) The p.Ala510Val  
517 mutation in the SPG7 (paraplegin) gene is the most common mutation causing adult  
518 onset neurogenetic disease in patients of British ancestry. *J Neurol* **260**: 1286–1294.
- 519 22. Salinas S, Proukakis C, Crosby A, Warner TT (2008) Hereditary spastic paraplegia:  
520 clinical features and pathogenetic mechanisms. *Lancet Neurol* **7**: 1127–1138.
- 521 23. Karlberg T, van den Berg S, Hammarström M, Sagemark J, Johansson I, Holmberg-  
522 Schiavone L, Schüler H (2009) Crystal structure of the ATPase domain of the human  
523 AAA+ protein paraplegin/SPG7. *PLoS One* **4**: e6975.
- 524 24. Bustamante CJ, Kaiser CM, Maillard RA, Goldman DH, Wilson CAM (2014)  
525 Mechanisms of cellular proteostasis: insights from single-molecule approaches. *Annu*  
526 *Rev Biophys* **43**: 119–140.
- 527 25. Bustamante C, Cheng W, Mejia YX (2011) Revisiting the Central Dogma One  
528 Molecule at a Time. *Cell* **144**: 480–497.
- 529 26. van Oijen AM, Dixon NE (2015) Probing molecular choreography through single-  
530 molecule biochemistry. *Nat Struct Mol Biol* **22**: 948–952.
- 531 27. Yodh JG, Schlierf M, Ha T (2010) Insight into helicase mechanism and function  
532 revealed through single-molecule approaches. *Q Rev Biophys* **43**: 185–217.
- 533 28. Frank J, Gonzalez RL (2010) Structure and dynamics of a processive Brownian motor:  
534 the translating ribosome. *Annu Rev Biochem* **79**: 381–412.
- 535 29. Lerner E, Cordes T, Ingargiola A, Alhadid Y, Chung S, Michalet X, Weiss S (2018)  
536 Toward dynamic structural biology: Two decades of single-molecule Förster resonance  
537 energy transfer. *Science* **359**: eaan1133.
- 538 30. Cisse I, Okumus B, Joo C, Ha T (2007) Fueling protein DNA interactions inside porous  
539 nanocontainers. *Proc Natl Acad Sci U S A* **104**: 12646–12650.
- 540 31. Swoboda M, Henig J, Cheng H-M, Brugger D, Haltrich D, Plumeré N, Schlierf M  
541 (2012) Enzymatic oxygen scavenging for photostability without pH drop in single-  
542 molecule experiments. *ACS Nano* **6**: 6364–6369.

- 543 32. Cheng H-M, Gröger P, Hartmann A, Schlierf M (2015) Bacterial initiators form  
544 dynamic filaments on single-stranded DNA monomer by monomer. *Nucleic Acids Res*  
545 **43**: 396–405.
- 546 33. Humphrey W, Dalke A, Schulten K (1996) VMD: visual molecular dynamics. *J Mol*  
547 *Graph* **14**: 33–38, 27–28.
- 548 34. van de Meent J-W, Bronson JE, Wiggins CH, Gonzalez RL (2014) Empirical Bayes  
549 methods enable advanced population-level analyses of single-molecule FRET  
550 experiments. *Biophys J* **106**: 1327–1337.
- 551 35. Bonn F, Pantakani K, Shoukier M, Langer T, Mannan AU (2010) Functional  
552 evaluation of paraplegin mutations by a yeast complementation assay. *Hum Mutat* **31**:  
553 617–621.
- 554 36. Mickler M, Hessling M, Ratzke C, Buchner J, Hugel T (2009) The large  
555 conformational changes of Hsp90 are only weakly coupled to ATP hydrolysis. *Nat*  
556 *Struct Mol Biol* **16**: 281–286.
- 557 37. Ait-Haddou R, Herzog W (2003) Brownian ratchet models of molecular motors. *Cell*  
558 *Biochem Biophys* **38**: 191–214.
- 559 38. Astumian RD (1997) Thermodynamics and kinetics of a Brownian motor. *Science* **276**:  
560 917–922.
- 561 39. Aubin-Tam ME, Olivares AO, Sauer RT, Baker TA, Lang MJ (2011) Single-molecule  
562 protein unfolding and translocation by an ATP-fueled proteolytic machine. *Cell* **145**:  
563 257–267.
- 564 40. Maillard RA, Chistol G, Sen M, Righini M, Tan J, Kaiser CM, Hodges C, Martin A,  
565 Bustamante C (2011) ClpX(P) generates mechanical force to unfold and translocate its  
566 protein substrates. *Cell* **145**: 459–469.
- 567 41. Kenniston JA, Baker TA, Fernandez JM, Sauer RT (2003) Linkage between ATP  
568 consumption and mechanical unfolding during the protein processing reactions of an  
569 AAA+ degradation machine. *Cell* **114**: 511–520.
- 570 42. Grieb MS, Nivina A, Cheeseman BL, Hartmann A, Mazel D, Schlierf M (2017)  
571 Dynamic stepwise opening of integron attC DNA hairpins by SSB prevents toxicity  
572 and ensures functionality. *Nucleic Acids Res* **45**: 10555–10563.
- 573



574

## Supplementary Information

575

576 **ATPase and protease domain movements in the bacterial AAA+ protease**

577

**FtsH are driven by thermal fluctuations**

578

579

Martine Ruer<sup>1,2,†</sup>, Georg Krainer<sup>1,3,†</sup>, Philip Gröger<sup>1</sup>, Michael Schlierf<sup>1,\*</sup>

580

581

<sup>1</sup> B CUBE – Center for Molecular Bioengineering, Technische Universität Dresden,

582

Arnoldstr. 18, 01307 Dresden, Germany

583

<sup>2</sup> Current address: Max Planck Institute of Molecular Cell Biology and Genetics (MPI-CBG),

584

Pfotenhauer Str. 108, 01307 Dresden, Germany

585

<sup>3</sup> Molecular Biophysics, Technische Universität Kaiserslautern (TUK), Erwin-Schrödinger-

586

Str. 13, 67663 Kaiserslautern, Germany

587

588

<sup>†</sup> These authors contributed equally to this work.

589

\* Corresponding author. Tel: +49 351 463 43050; E-mail: michael.schlierf@tu-dresden.de

590 **Supplementary Figures**

591

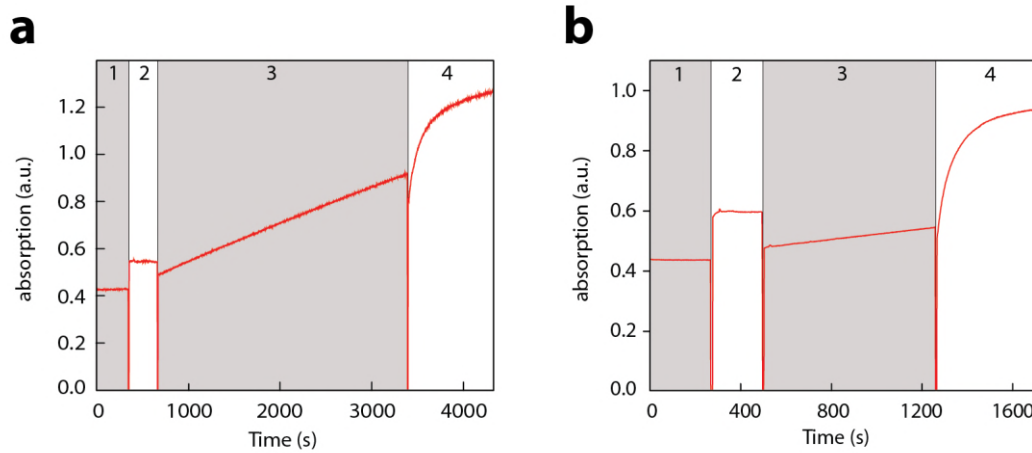

592

593 **Figure S1. ATPase activity assay of *TmFtsH*<sub>184,513</sub> (a) and *TmFtsH*<sub>184,513</sub>-A359V (b).**

594 Monitored is the absorbance of 2-amino-6-mercapto-7-methyl-purine at 360 nm that is  
595 generated in the EnzChek Phosphate Assay upon release of free phosphate in solution.

596 The four phases indicate (1) the background absorption of the buffer (20 mM HEPES  
597 pH 8.0, 150 mM KCl, 10% glycerol, 5 mM MgOAc, 12.5 μM ZnOAc), (2) the  
598 absorbance upon addition of 1 mM ATP, (3) the absorbance upon addition of 14.4 μM  
599 *TmFtsH*<sub>184,513</sub> or *TmFtsH*<sub>184,513</sub>-A359V, and (4) the absorbance upon addition of 0.8 μM  
600 cI-ssrA substrate. The reactions were performed at room temperature.

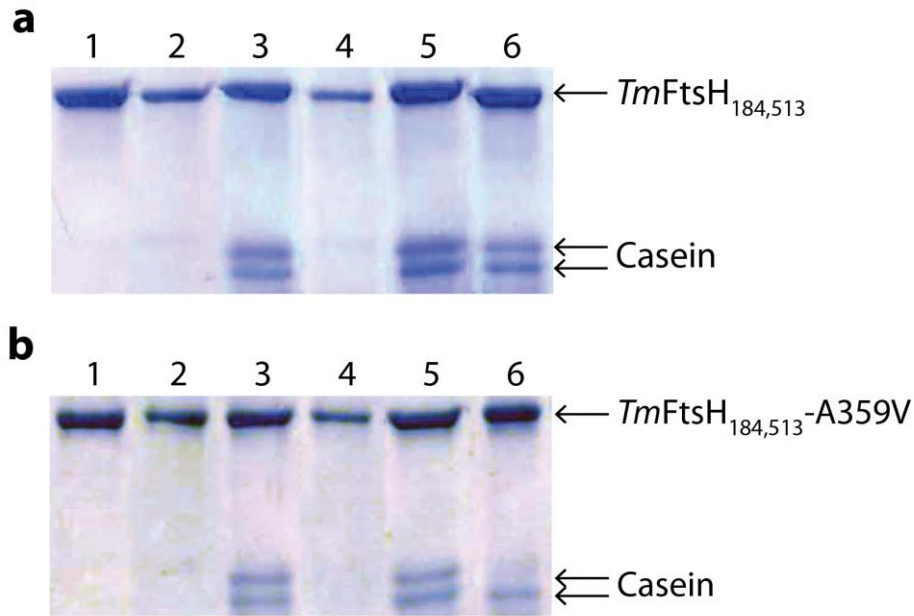

601

602

**Figure S2. Protease activity of *TmFtsH*<sub>184,513</sub> and *TmFtsH*<sub>184,513</sub>-A359V.**

603

a) *TmFtsH*<sub>184,513</sub> (2.4 μM) incubated with 1 mM casein and 1 mM ATP at 24°C (1) and at

604

50°C (2); with 1 mM casein only at 24°C (3) and at 50°C (4); and with 1 mM casein,

605

1 mM ATP, and 0.1 mM EDTA at 24°C (5) and at 50°C (6). b) *TmFtsH*<sub>184,513</sub>-A359V

606

(2.4 μM) incubated with 1 mM casein and 1 mM ATP at 24°C (1) and at 50°C (2); with

607

1 mM casein only at 24°C (3) and at 50°C (4) and with 1 mM casein, 1 mM ATP, and

608

0.1 mM EDTA at 24°C (5) and at 50°C (6). The reaction was conducted overnight in

609

buffer containing 20 mM HEPES pH 8.0, 150 mM KCl, 10% glycerol, 5 mM MgOAc,

610

12.5 μM ZnOAc.

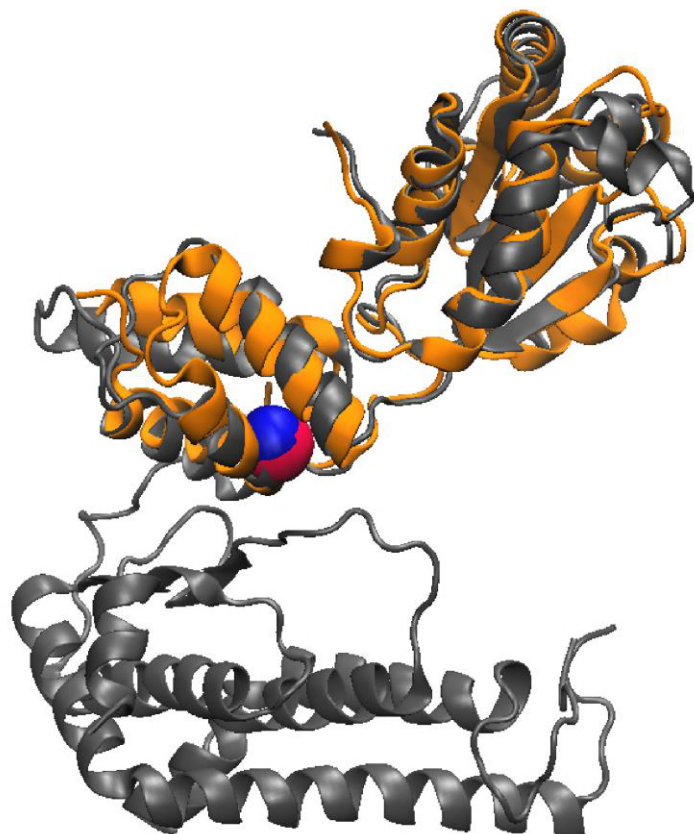

611

612 **Figure S3. Structural alignment of *TmFtsH* (gray; pdb: 3KDS) and its structural**  
613 **human homolog paraplegin (orange; pdb: 2QZ4).** Alanine residue 359 (blue,  $C_{\alpha}$ ) and  
614 the homologous pathogenic mutation A510V (red,  $C_{\alpha}$ ) are highlighted. Both mutations  
615 are located at the boundary of the ATPase and protease domains. Alignment was  
616 performed in VMD.

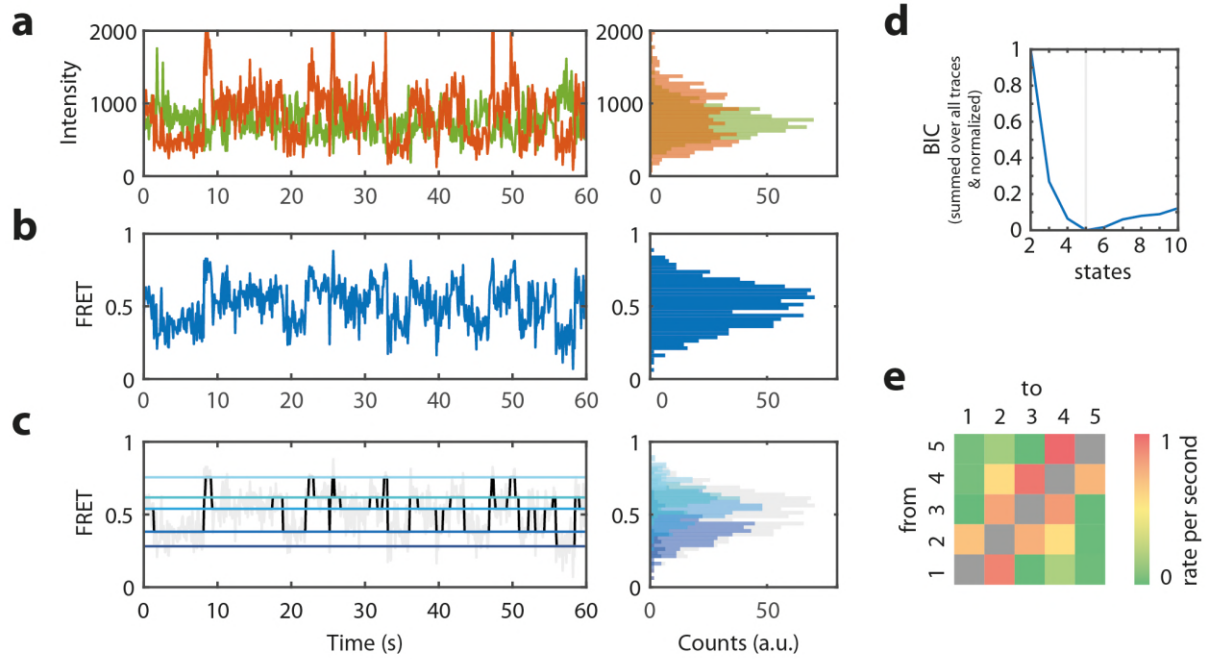

617

618 **Figure S4. *TmFtsH*<sub>184,513</sub> with 1 mM ATP.** a) Representative donor and acceptor  
619 fluorescence intensity time trajectories (left panel) and their distributions (right panel).  
620 b) smFRET time trajectory (left panel) constructed from (a) and the derived FRET  
621 efficiency histogram (right panel) c) Viterbi path reconstruction of the smFRET time  
622 trajectory in (b) using a five-state model (left panel) and the derived histogram (right  
623 panel) d) Global BIC function. e) Heatmap of all conformational transition rates of  
624 *TmFtsH*<sub>184,513</sub> in the presence of ATP.

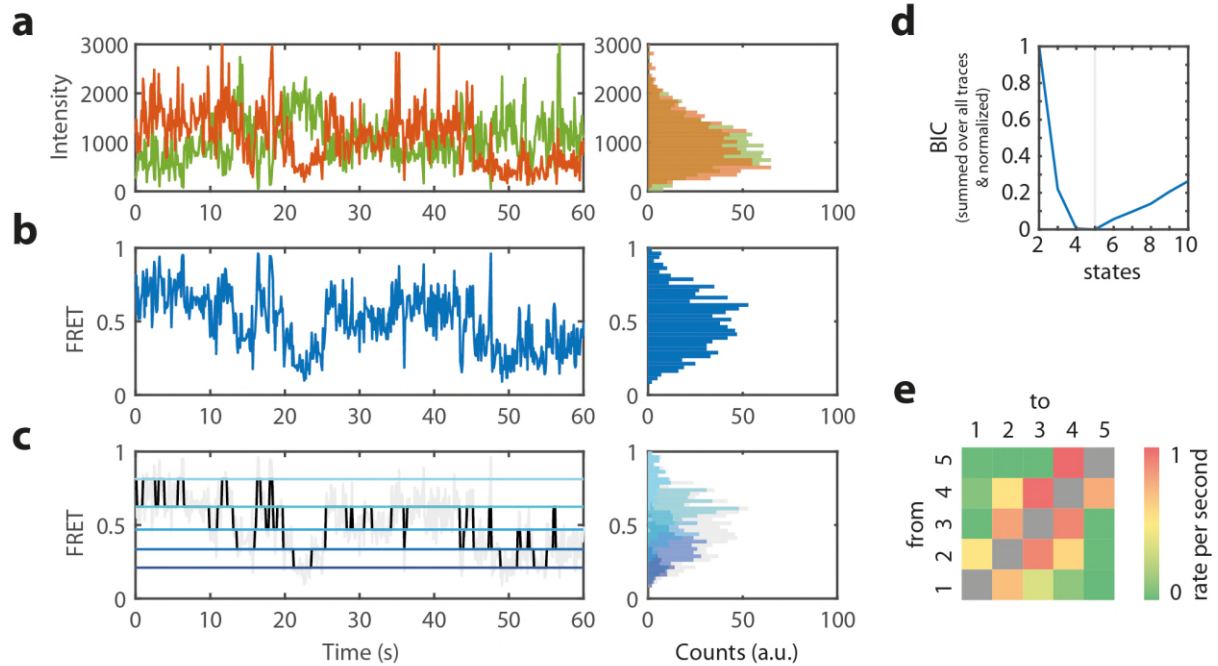

625

626

627

628

629

630

631

632

**Figure S5. *TmFtsH*<sub>184,513</sub>-A359V without ATP.** a) Representative donor and acceptor fluorescence intensity time trajectories (left panel) and their distributions (right panel). b) smFRET time trajectory (left panel) constructed from (a) and the derived FRET efficiency histogram (right panel) c) Viterbi path reconstruction of the smFRET time trajectory in (b) using a five-state model (left panel) and the derived histogram (right panel) d) Global BIC function. e) Heatmap of all conformational transition rates of *TmFtsH*<sub>184,513</sub>-A359V in the absence of ATP.



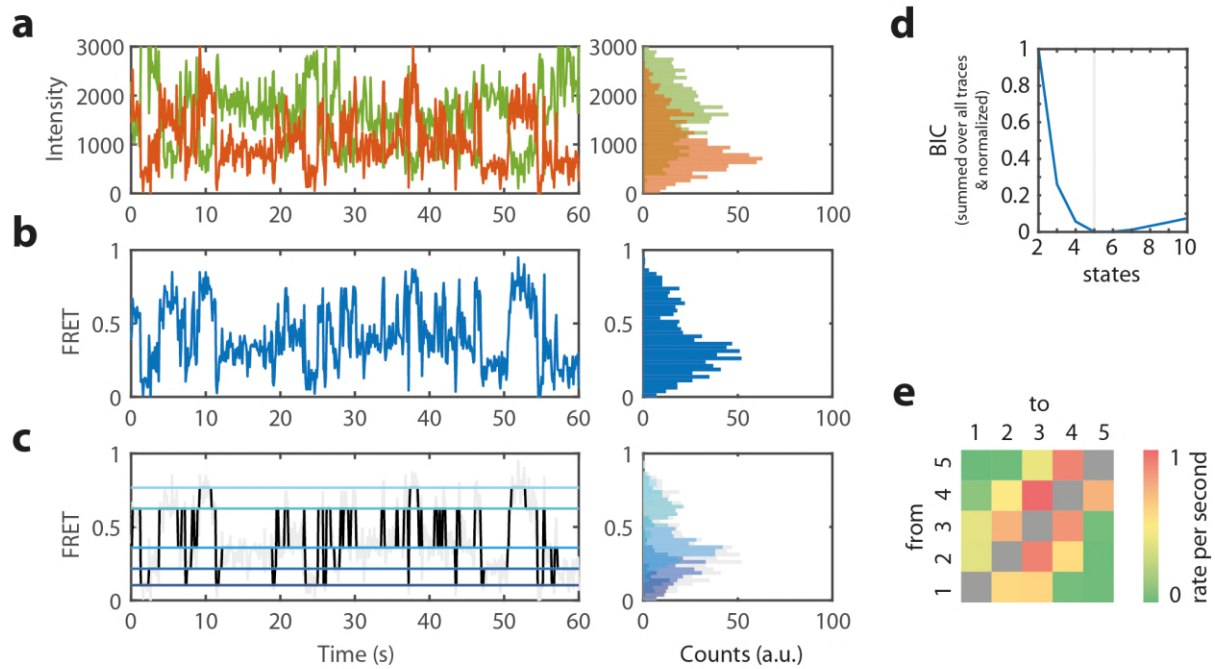

633

634

635

636

637

638

639

640

**Figure S6. *TmFtsH*<sub>184,513</sub>-A359V with 1 mM ATP.** a) Representative donor and acceptor fluorescence intensity time trajectories (left panel) and their distributions (right panel). b) smFRET time trajectory (left panel) constructed from (a) and the derived FRET efficiency histogram (right panel) c) Viterbi path reconstruction of the smFRET time trajectory in (b) using a five-state model (left panel) and the derived histogram (right panel) d) Global BIC function. e) Heatmap of all conformational transition rates of *TmFtsH*<sub>184,513</sub>-A359V in the presence of ATP.

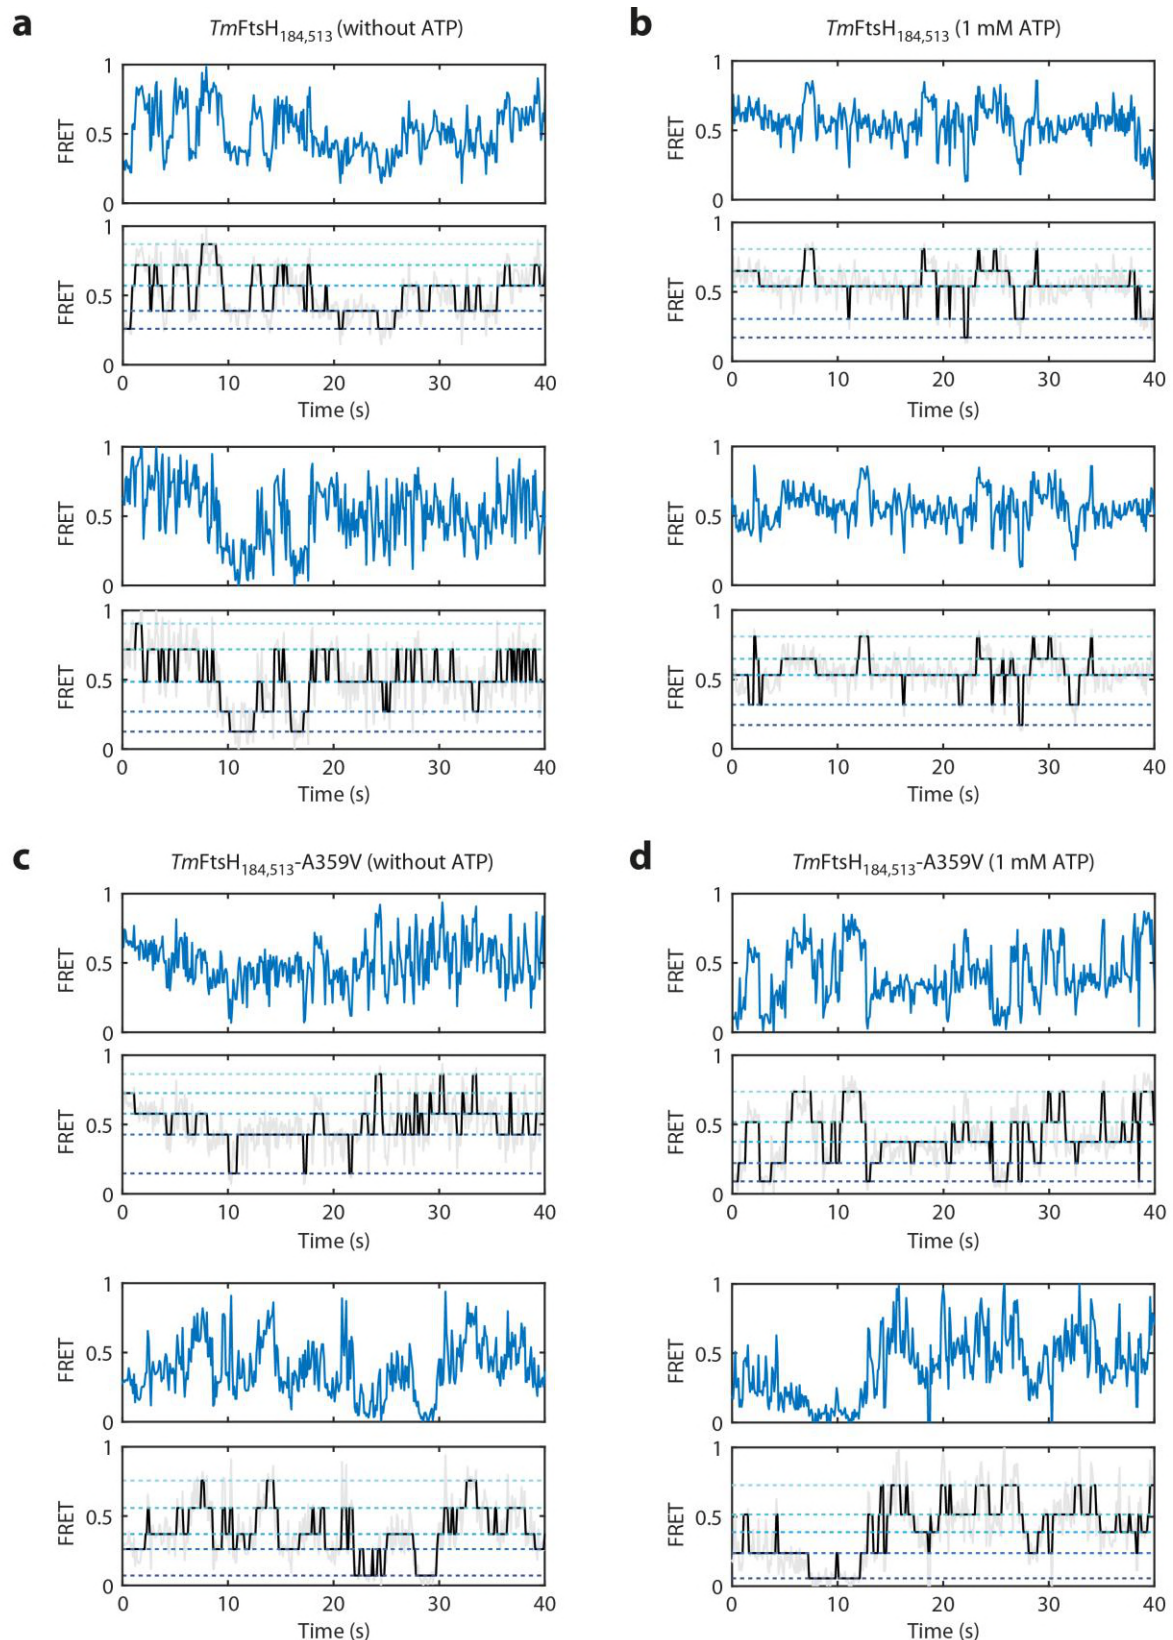

641

642

643

644

645

**Figure S7. Selection of smFRET time trajectories of *TmFtsH*<sub>184,513</sub> and *TmFtsH*<sub>184,513</sub>-A359V in the presence and absence of ATP. Top panels: smFRET time trajectories. Bottom panels: Viterbi path reconstruction of the smFRET trajectories using a five-state model.**
